# Supplementary material
Source: publisher figshare collection journal article supplement (https://sage.figshare.com/ndownloader/files/16188278)
Supplement: Supplementary file 1 [file 16188278]

Worm Growth

Measure the worm below.


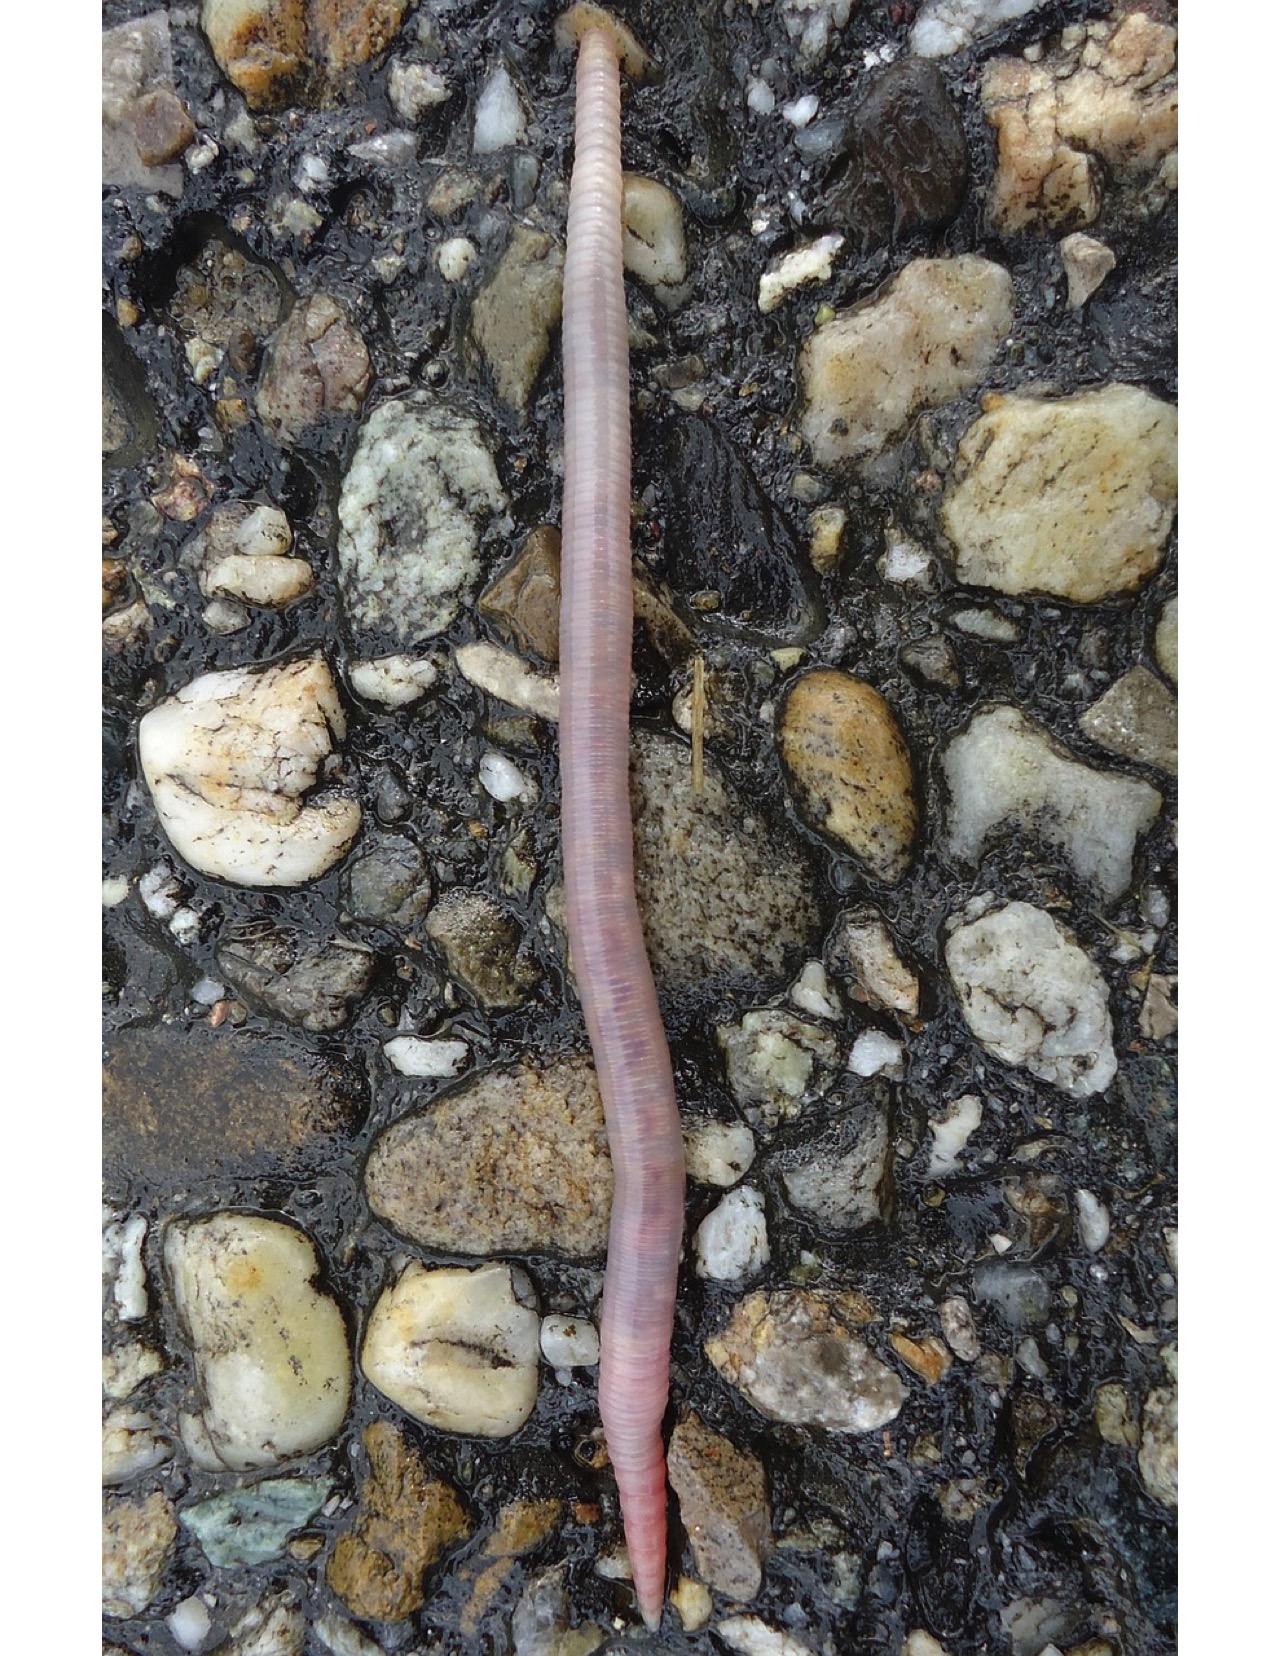
How long was the worm this week? ________cm.

Draw last week’s worm below (5 cm.)
